# Supplementary material
Source: PubMed Central journal article supplement (PMC3993968)
Supplement: pr401090d_si_001.pdf [file pr401090d_si_001.pdf]

## Supporting Information

### Assessment of MS/MS search algorithms with parent-protein profiling

Miin S. Lin<sup>1,3</sup>, Justin J Cherny<sup>1,3</sup>, Claire T. Fournier<sup>1</sup>, Samuel J. Roth<sup>1</sup>, Danny Krizanc<sup>2</sup> and Michael P. Weir<sup>1,\*</sup>

<sup>1</sup>Department of Biology, Wesleyan University Middletown CT 06459.

<sup>2</sup>Department of Mathematics and Computer Science, Wesleyan University Middletown CT 06459.

**Supplementary Table 1.** Detection of peptides by multiple OMSSA parameter sets.

#### A b/y ion screen

| OMSSA<br>parameter<br>set | Number of OMSSA parameter sets <sup>1</sup> |            |            |            |              |              |
|---------------------------|---------------------------------------------|------------|------------|------------|--------------|--------------|
|                           | All<br>(3,922)                              | 1<br>(198) | 2<br>(667) | 3<br>(276) | 4<br>(1,097) | 5<br>(1,684) |
| 0                         | 3060                                        | 10         | 74         | 197        | 1095         | 1684         |
| 1                         | 3644                                        | 90         | 597        | 194        | 1079         | 1684         |
| 2                         | 2134                                        | 56         | 16         | 131        | 247          | 1684         |
| 3                         | 3295                                        | 38         | 578        | 120        | 875          | 1684         |
| 4                         | 3035                                        | 4          | 69         | 186        | 1092         | 1684         |

#### B a/b/y ion screen

| OMSSA<br>parameter<br>set | Number of OMSSA parameter sets <sup>1</sup> |            |            |            |              |              |
|---------------------------|---------------------------------------------|------------|------------|------------|--------------|--------------|
|                           | All<br>(3,662)                              | 1<br>(286) | 2<br>(766) | 3<br>(255) | 4<br>(1,059) | 5<br>(1,296) |
| 0                         | 2583                                        | 12         | 53         | 163        | 1059         | 1296         |
| 1                         | 3393                                        | 136        | 714        | 200        | 1047         | 1296         |
| 2                         | 1702                                        | 75         | 21         | 129        | 181          | 1296         |
| 3                         | 3065                                        | 50         | 695        | 129        | 895          | 1296         |
| 4                         | 2556                                        | 13         | 49         | 144        | 1054         | 1296         |

<sup>1</sup> Distinct peptides are counted once per LC-MS/MS Run and also counted once even if seen in multiple parameter sets. The table partitions matched peptides according to the number of OMSSA parameter sets in which they were detected.

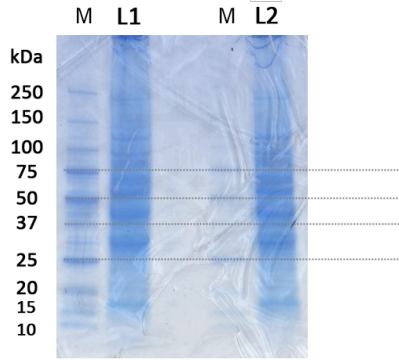

| GelSlice_Wes_6 |                  |                  |     |
|----------------|------------------|------------------|-----|
| Lane           | MS/MS experiment | Size Range (kDa) |     |
|                |                  | min              | max |
| L1             | 1                | 25               | 37  |
| L2             | 2                | 25               | 37  |
| L1             | 3                | 37               | 50  |

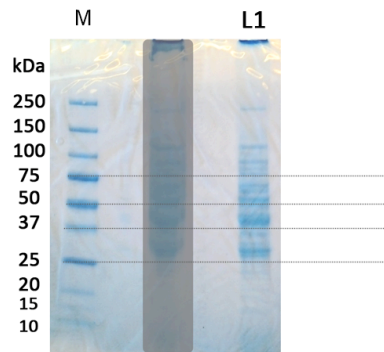

| GelSlice_Wes_10 |                  |                  |     |
|-----------------|------------------|------------------|-----|
| Lane            | MS/MS experiment | Size Range (kDa) |     |
|                 |                  | min              | max |
| L1              | 4                | 37               | 50  |
| L1              | 5                | 25               | 37  |
| L1              | 6                | 50               | 75  |

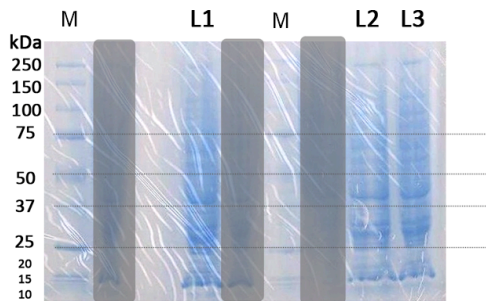

| GelSlice_Wes_12 |                  |                  |     |
|-----------------|------------------|------------------|-----|
| Lane            | MS/MS experiment | Size Range (kDa) |     |
|                 |                  | min              | max |
| L2              | 7                | 25               | 37  |
| L2              | 8                | 37               | 50  |
| L2              | 9                | 50               | 75  |
| L1              | 10               | 25               | 37  |
| L1              | 11               | 37               | 50  |
| L3              | 12               | 25               | 37  |
| L3              | 13               | 37               | 50  |

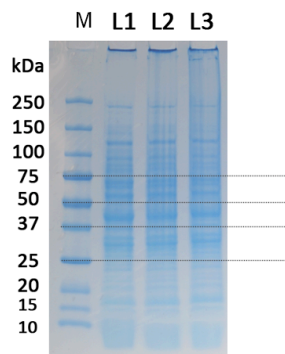

| GelSlice_Wes_14 |                  |                  |     |
|-----------------|------------------|------------------|-----|
| Lane            | MS/MS experiment | Size Range (kDa) |     |
|                 |                  | min              | max |
| L1              | 14               | 25               | 37  |
| L2              | 15               | 25               | 37  |
| L3              | 16               | 25               | 37  |
| L1              | 17               | 37               | 50  |
| L2              | 18               | 37               | 50  |
| L3              | 19               | 37               | 50  |
| L1              | 20               | 50               | 75  |
| L2              | 21               | 50               | 75  |
| L3              | 22               | 50               | 75  |

**Supplementary Figure 1.** Partitioning of parent proteins via SDS-PAGE. Illustrated are the 22 gel slices utilized in this analysis. The gel slices fell in three size ranges: 25-37 kDa (9 slices), 37-50 kDa (8 slices) and 50-75 kDa (5 slices). Our earlier experiments focused on the two lower size ranges. The

three size ranges encompass 55.4% (62.5% if not including dubious ORF assignments) of the predicted molecular weights of annotated proteins without post-translational modifications (using 10% mass tolerance: 22.5 kDa to 82.5 kDa).

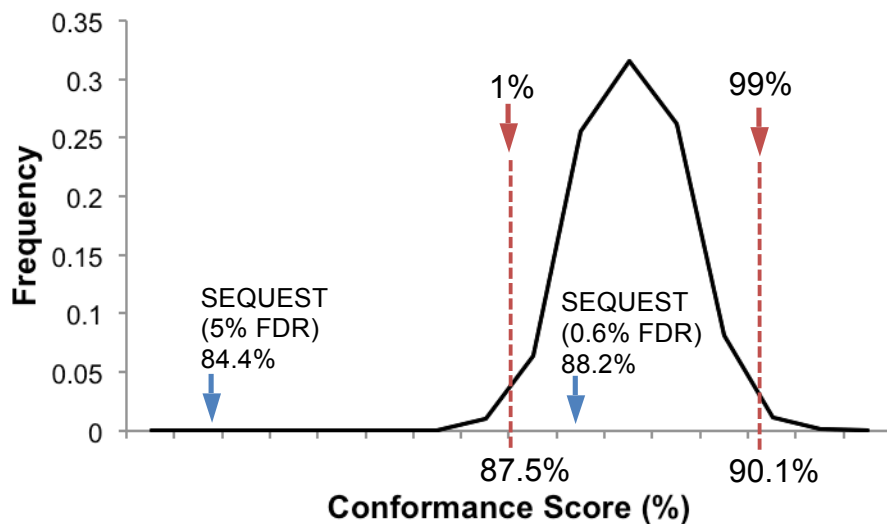

**Supplementary Figure 2.** Bootstrap analysis of parent protein conformance. 3,060 PSMs were sampled with replacement 1,000 times using output from OMSSA parameter set 0 after filtering at an FDR of 5%. The conformance rate for SEQUEST filtered at 5% FDR is significantly below the 1% distribution threshold whereas conformance of SEQUEST filtered at 0.6% FDR is within the 1% to 99% confidence thresholds range.

### A OMSSA Parameter Set 1

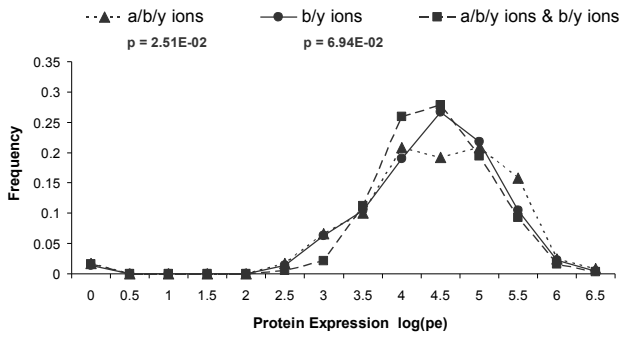

### B OMSSA Parameter Set 2

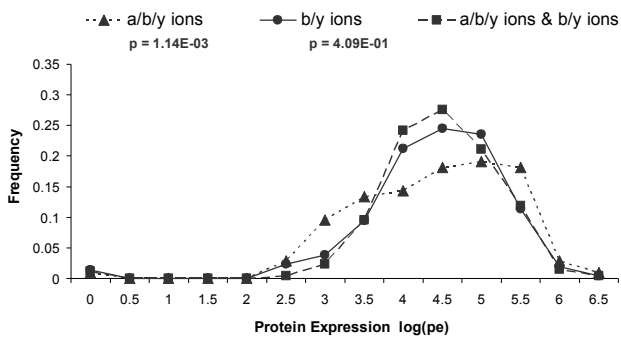

### C OMSSA Parameter Set 3

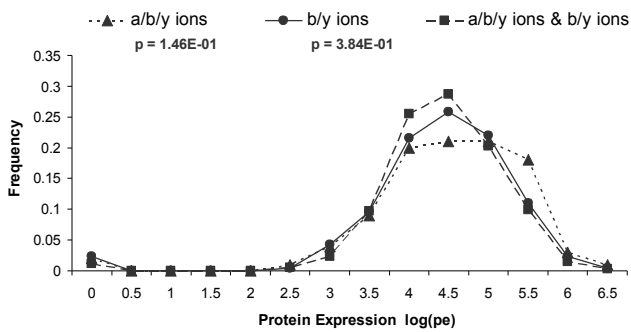

### D OMSSA Parameter Set 4

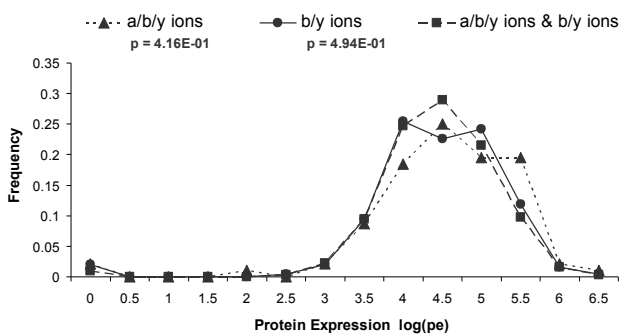

**Supplementary Figure 3.** Comparison of protein expression for a/b/y and b/y ion screens. Subsets of peptides detected by the b/y ion screen alone, or the a/b/y ion screen alone, had similar protein expression to those detected by both the b/y and a/b/y ion screens. Also see Fig. 4 in main paper.

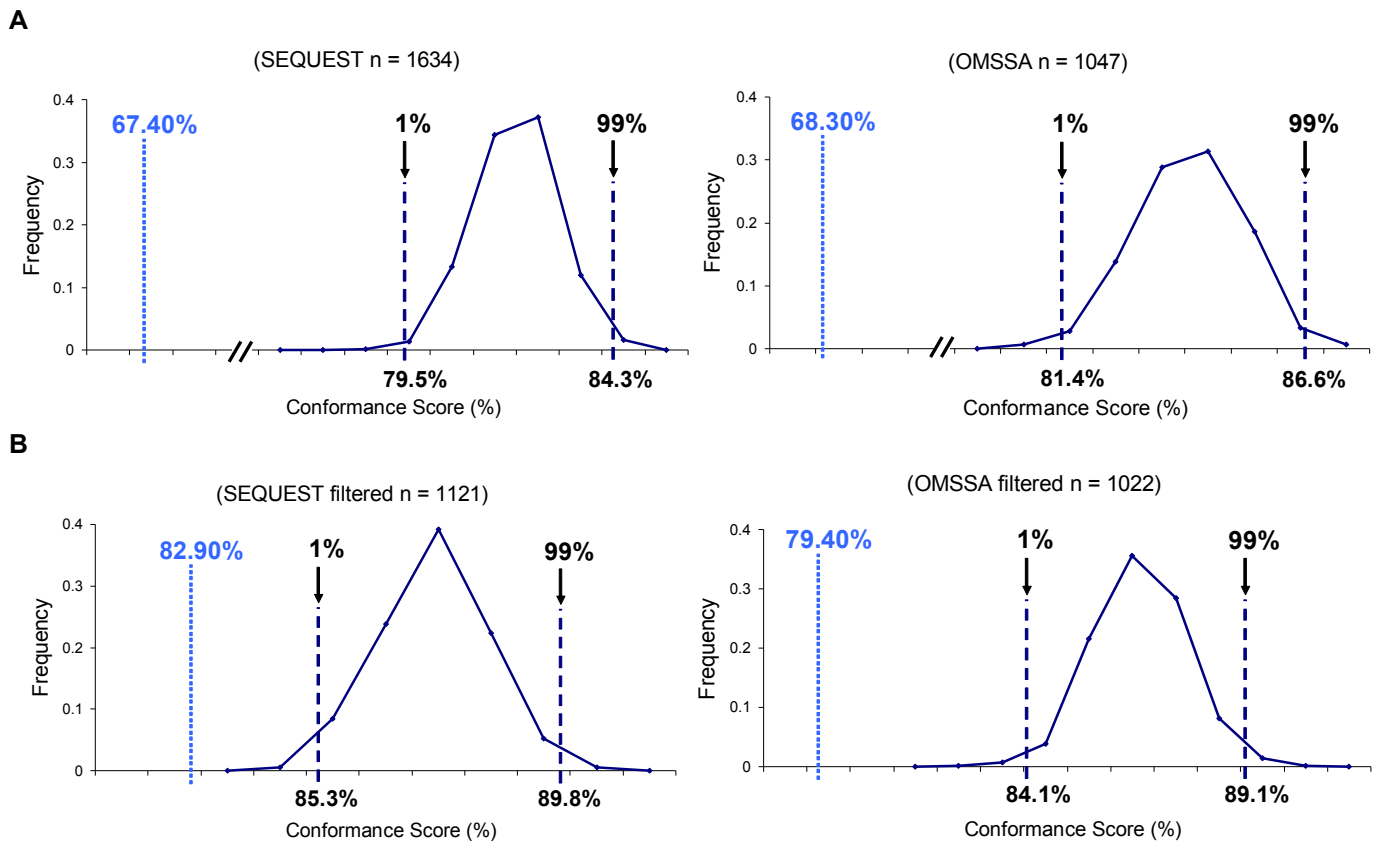

**Supplementary Figure 4.** Bootstrap analysis shows significantly depressed conformance scores for SEQUEST-only and OMSSA-only matches – both before and after application of algorithm-specific filters. Dotted lines and percentages represent the conformance score based on distinct peptides detected by SEQUEST or OMSSA alone. Dashed lines and percentages represent the 1<sup>st</sup> and 99<sup>th</sup> percentiles. **A.** Left panel: Distribution of 1,000 conformance scores calculated after random sampling with replacement of 1,634 samples from a full set of 5,016 distinct peptides per LC-MS/MS run detected by SEQUEST. Right panel: Distribution of 1,000 conformance scores calculated after random sampling with replacement of 1,047 samples from a full set of 4,429 distinct peptides per LC-MS/MS run detected by OMSSA. **B.** Left panel: Distribution of 1,000 conformance scores calculated after random sampling with replacement of 1,121 samples from a full set of 4,221 distinct peptides per LC-MS/MS run detected by both b/y and a/b/y ion screens of SEQUEST. Right panel: Distribution of 1,000 conformance scores calculated after random sampling with replacement of 1,022 samples from a full set of 4,122 distinct peptides per LC-MS/MS run detected by more than one parameter set of OMSSA.

### A SEQUEST

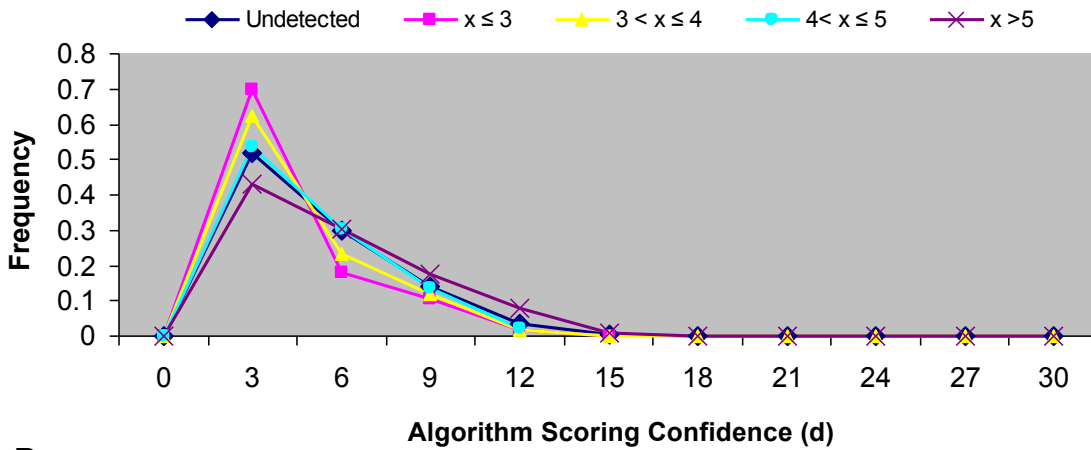

### B OMSSA

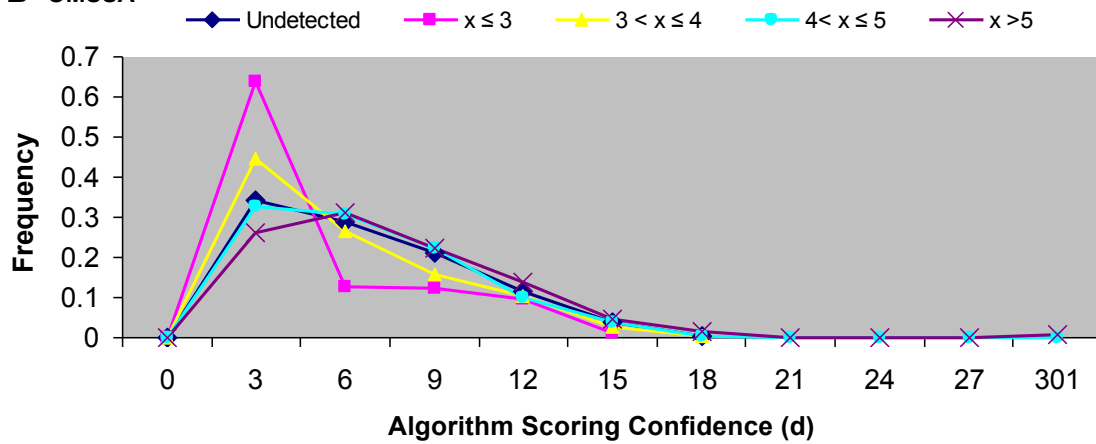

**Supplementary Figure 5.** Protein expression and algorithm score confidence are related. For both SEQUEST and OMSSA, low expression proteins (e.g. pink line) tend to have lower-confidence algorithm peptide-spectrum match (PSM) scores whereas high expression proteins (e.g. purple line) tend to have both lower- or higher-confidence PSM scores.
